# Supplementary material for: Forest loss in New England: A projection of recent trends
Source: PubMed Central journal article supplement (PMC5730125; doi:10.1371/journal.pone.0189636), 2017-12-14
Supplement: pone.0189636.s001.pdf [file pone.0189636.s001.pdf]

| <b>CCDC Class</b>           | <b>CCDC Description</b>                                                                                                                            | <b>Reclassification</b> |
|-----------------------------|----------------------------------------------------------------------------------------------------------------------------------------------------|-------------------------|
| Disturbed                   | Areas of no-data or missing data due to clouds, shadows, etc.                                                                                      | No Data                 |
| Bare                        | Non-vegetated land comprised of above 60% rock, sand, or soil                                                                                      | Other                   |
| Commercial/Industrial       | Area of urban development; impervious surface area target 80-100%                                                                                  | High Density Developed  |
| High Density Residential    | Area of residential urban development with some vegetation; impervious surface area target 50-80%                                                  | High Density Developed  |
| Low Density Residential     | Area of residential urban development with significant vegetation; impervious surface area target 0-50%                                            | Low Density Developed   |
| Herbaceous / Grassland      | Non-woody naturally occurring or slightly managed plants; includes pastures                                                                        | Other                   |
| Agriculture                 | Non-woody cultivated plants; includes cereal and broadleaf crops                                                                                   | Agriculture             |
| Mixed Forest                | Forested land with at least 40% tree canopy cover comprising no more than 80% of either evergreen needleleaf or deciduous broadleaf cover          | Forest                  |
| Deciduous Broadleaf Forest  | Forested land with at least 40% tree canopy cover comprising more than 80% deciduous broadleaf cover                                               | Forest                  |
| Evergreen Needleleaf Forest | Forested land with at least 40% tree canopy cover comprising more than 80% evergreen needleleaf cover                                              | Forest                  |
| Wetland                     | Vegetated land (woody and non-woody) with inundation from high water table; includes swamps, salt and freshwater marshes and tidal rivers/mudflats | Other                   |
| Water                       | Lakes, ponds, rivers, and ocean                                                                                                                    | Other                   |
| Woody Wetland               | Additional class of wetland that tries to separate wetlands with considerable biomass from mainly herbaceous wetlands                              | Forest                  |
| NoData                      | NoData                                                                                                                                             | No Data                 |
